# Supplementary material for: European Domestic Horses Originated in Two Holocene Refugia
Source: PubMed Central journal article supplement (PMC3068172; doi:10.1371/journal.pone.0018194), 2011-03-30
Supplement: pone.0018194.s002.pdf [file pone.0018194.s002.pdf]

Supplementary Table S2. Expected homozygosity ( $F_S$ ) of different European horse breeds with the Arab, Akhal Teke, and Caspian, respectively.

| Breed            | Group                  | Expected homozygosity $F_S$ |           |         |
|------------------|------------------------|-----------------------------|-----------|---------|
|                  |                        | Arab                        | AkhalTeke | Caspian |
| AltmarkDraught   | Central Europe/Britain | 0.18                        | 0.20      | 0.21    |
| Camargue         | Central Europe/Britain | 0.22                        | 0.22      | 0.21    |
| Comtois          | Central Europe/Britain | 0.20                        | 0.19      | 0.19    |
| Connemara        | Central Europe/Britain | 0.21                        | 0.22      | 0.20    |
| Dale             | Central Europe/Britain | 0.19                        | 0.19      | 0.21    |
| Exmoor           | Central Europe/Britain | 0.19                        | 0.21      | 0.21    |
| Haflinger        | Central Europe/Britain | 0.18                        | 0.19      | 0.22    |
| Highland         | Central Europe/Britain | 0.20                        | 0.21      | 0.21    |
| Hucul            | Central Europe/Britain | 0.20                        | 0.19      | 0.22    |
| Noriker          | Central Europe/Britain | 0.18                        | 0.20      | 0.22    |
| Posavina         | Central Europe/Britain | 0.19                        | 0.20      | 0.22    |
| SchleswigDraught | Central Europe/Britain | 0.20                        | 0.20      | 0.20    |
| Shetland         | Central Europe/Britain | 0.21                        | 0.23      | 0.23    |
| SuffolkPunch     | Central Europe/Britain | 0.19                        | 0.21      | 0.20    |
| Asturcon         | IberianPeninsula       | 0.20                        | 0.20      | 0.21    |
| Gallego          | IberianPeninsula       | 0.21                        | 0.21      | 0.20    |
| Garrano          | IberianPeninsula       | 0.21                        | 0.21      | 0.20    |
| JacaNavarra      | IberianPeninsula       | 0.21                        | 0.22      | 0.21    |
| Losino           | IberianPeninsula       | 0.21                        | 0.20      | 0.20    |
| Lusitano         | IberianPeninsula       | 0.25                        | 0.23      | 0.21    |
| Pottoka          | IberianPeninsula       | 0.19                        | 0.20      | 0.20    |
